# Supplementary material for: Anemia in patients ten years after bariatric surgery
Source: Research Square preprint supplement (doi:10.21203/rs.3.rs-3920388/v1), 2024-02-07
Supplement: Supplementary file 1 [file 1788fe02914c9c35635bdeca.xlsx]

## Sheet: Blad1
	Prior to surgery	Follow-up 5 years	Follow-up 10 years
Total population
Number	59557	29236	8047
Sex
Women	45446	22559	6309
Men	14111	6677	1738
Age at surgery
Mean	41	42.4	42.8
(range)	(18 – 74)	(18 – 74)	(18 – 73)
Method of surgery
GBY*	51419	25713	7909
SG**	7694	3245	42
DS***	444	278	96
Weight
Mean	120.5	86.5	90.1
(range)	(62 – 290)	(42 – 205)	(45 – 280)
Weight lost (%)
Mean		27.7	25.6
(range)		(-246 – +70.1)	(-28 – +68)
BMI
Mean	42	30.2	31.6
(range)	(24.9 – 96.9)	(15.6 – 171.1)	(16 – 89)
Smoking
Yes	1825	2566	508
Former smoker	7 350	4 000	775
No	31605	14444	2824
Mising	14887	8226	3940
