# Supplementary material for: Anemia in patients ten years after bariatric surgery
Source: Research Square preprint supplement (doi:10.21203/rs.3.rs-3920388/v1), 2024-02-07
Supplement: Supplementary file 2 [file 275d6c2a36fbd9f8dde0c182.xlsx]

## Sheet: Blad1
	Follow-up 5 years	Valid percent	Follow-up 10 years	Valid percent
All
PPI*
Yes	2515	10	563	14
No	15537	90	3491	86
Missing	11184		3993
Stomal ulcer
Yes	443	2	199	2
No	28757	98	7826	98
Missing	36		22
Women
PPI*
Yes	2020	14	427	13
No	11911	86	2750	87
Missing	8628		3132
Stomal ulcer
Yes	322	1	157	2
No	22209	99	6136	98
Missing	28		16
Men
PPI*
Yes	495	12	136	16
No	3626	88	741	84
Missing	2556		861
Stomal ulcer
Yes	121	2	42	2
No	6548	98	1690	98
Missing	8		6
