# Supplementary material for: Anemia in patients ten years after bariatric surgery
Source: Research Square preprint supplement (doi:10.21203/rs.3.rs-3920388/v1), 2024-02-07
Supplement: Supplementary file 3 [file a2f71b8b525dfb227d6d6a91.xlsx]

## Sheet: Blad1
	Prior to surgery	Follow-up 5 years	Follow-up 10 years
Total population
Mean Hb	140.7	131.8	131.6
(range)	(45 – 190)	(40 – 185)	(53 – 175)
Number	29877	17993	4347
% with anemia*	4.1%	18.3%	18.9%
Divided by sex
Women
Mean Hb	137.1	128.3	129.1
(range)	(75 – 181)	(50 - 183)	(53 - 172)
Number	22943	13944	3400
% with anemia*	4.8%	20.3%	18.9%
Men
Mean Hb	152.5	143.8	140.5
(range)	(45 – 190)	(40 – 185)	(68 – 175)
Number	6934	4049	947
% with anemia*	1.6%	11.2%	18.8%
Divided by sex and with anemia*
Women
Mean Hb
(range)	113.6	108.5	108.8
Number	(75 – 119)	(50 – 119)	(53 – 119)
	1109	2838	644
Men
Mean Hb
(range)	122.4	119.4	117.8
Number	(45 – 129)	(40 – 129)	(68 – 129)
	113	456	178
Divided by method of surgery
GBY**
Mean Hb
(range)	140.9	131.4	131.6
Number	(81 – 189)	(40 – 184)	(53 – 175)
	23453	15737	4271
SG***
Mean Hb
(range)	139.9	134.8	137
Number	(45 – 190)	(81 – 185)	(115 – 159)
	6248	2053	12
DS****
Mean Hb
(range)	144	131.7	128.6
Number	(115 – 179)	(97 – 168)	(58 – 165)
	176	203	64
