# Supplementary material for: Anemia in patients ten years after bariatric surgery
Source: Research Square preprint supplement (doi:10.21203/rs.3.rs-3920388/v1), 2024-02-07
Supplement: Supplementary file 4 [file d58fce4d7777eb9f61885d86.xlsx]

## Sheet: Blad1
	Follow-up 5 years	Valid percent	Follow-up 10 years	Valid percent
Women
Multivitamin*
Yes	14148	89	4051	79
No	2086	11	1064	21
Missing	6325		1194
Oral iron
Yes	6642	44	2461	50
No	8623	56	2466	50
Missing	7294		1382
Parenteral iron
Yes	789	6	550	12
No	12874	94	3924	88
Missing	8896		1835
Complete multivitamin**
Yes	453	14	155	13
No	2 834	86	1 030	87
Missing	19272		1835
B12
Yes	15383	93	4 829	92
No	1193	7	419	8
Missing	5983		1061
Folic acid
Yes	3 390	23	1 435	30
No	11 187	77	3 331	70
Missing	7982		1543
Vitamin D and calcium
Yes	12724	78	4 063	79
No	3 543	22	1 063	21
Missing	6292		1183
	Follow-up 5 years	Valid percent	Follow-up 10 years	Valid percent
Men
Multivitamin*
Yes	3859	86	997	76
No	641	14	315	24
Missing	2177		426
Oral iron
Yes	1011	25	462	37
No	3063	75	785	63
Missing	2603		491
Parenteral iron
Yes	79	2	61	5
No	3691	98	1069	95
Missing	2907		608
Complete multivitamin**
Yes	123	13	38	12
No	804	87	287	88
Missing	5750		1413
B12
Yes	4295	92	1 213	89
No	347	8	149	11
Missing	2035		376
Folic acid
Yes	756	19	273	23
No	3 257	81	928	77
Missing	2664		537
Vitamin D and calcium
Yes	3 509	77	971	73
No	1 034	23	355	27
Missing	2134		412
