# Supplementary material for: Anemia in patients ten years after bariatric surgery
Source: Research Square preprint supplement (doi:10.21203/rs.3.rs-3920388/v1), 2024-02-07
Supplement: Supplementary file 5 [file deacea206641a9e2e2fe3778.xlsx]

## Sheet: Blad1
	Follow-up 5 years	Valid percent	Follow-up 10 years	Valid percent
Multivitamin*
Yes	18007	87	5048	78
No	2727	13	1379	22
Missing	8502		1620
Oral iron
Yes	7653	40	2923	45
No	11686	60	3251	55
Missing	9897		1873
Parenteral iron
Yes	868	5	611	11
No	16565	95	4993	89
Missing	11803		1873
Complete multivitamin**
Yes	576	14	193	13
No	3638	86	1317	87
Missing	25022		6537
B12
Yes	19678	93	6042	91
No	1540	7	568	9
Missing	8018		1437
Folic acid
Yes	4146	22	1708	29
No	14444	78	4259	71
Missing	10646		2080
Vitamin D and calcium
Yes	16233	78	5 034	78
No	4 577	22	1 418	22
Missing	8 426		1 595
